# Supplementary material for: Development of the first sphingomyelin biomimetic stationary phase for immobilized artificial membrane (IAM) chromatography
Source: Royal Society of Chemistry journal article supplement (doi:10.1039/c2cc16872c), 2011-11-30
Supplement: c2cc16872c.pdf [file c2cc16872c.pdf]

## Electronic Supplementary Information (ESI)

Chem. Commun.

### Development of the first sphingomyelin biomimetic stationary phase for immobilized artificial membrane (IAM) chromatography

Dieter Verzele,<sup>a</sup> Frédéric Lynen,<sup>a</sup> Mike De Vrieze,<sup>a</sup> Adrian G. Wright,<sup>b</sup>  
Melissa Hanna-Brown<sup>b</sup> and Pat Sandra<sup>ac\*</sup>

<sup>a</sup> Pfizer Analytical Research Centre, Department of Organic Chemistry, Ghent University, Krijgslaan 281-S4bis, B-9000 Ghent, Belgium.

Fax: +32 9 264 4998; Tel: +32 9 264 9608; E-mail: pat.sandra@ugent.be

<sup>b</sup> Pfizer Global R&D Laboratories, Analytical Development, Ramsgate Road, Sandwich, Kent CT13 9NJ, United Kingdom.

Tel: +44 1304 642125; E-mail: melissa.hanna-brown@pfizer.com

<sup>c</sup> Research Institute for Chromatography, Kennedypark 26, B-8500 Kortrijk, Belgium.

Fax: +32 56 204859; Tel: +32 56 204031; E-mail: pat.sandra@richrom.com

---

#### **Details of the Partial Least Squares (PLS) regression analysis (Manuscript Fig. 2)**

The Partial Least Squares (PLS) regression analysis, shown in Fig. 2 in the manuscript, was performed with Matlab software. For 23 test compounds, *in vivo* log BB values were used to construct the y-block (response variable), while calculated molecular descriptors and experimental log  $k_{IAM}$  values were used to construct the X-block (descriptor variables) in a log BB prediction model.<sup>1</sup> Both were normalized before PLS analysis.

The following molecular descriptors were used: total molar charge ( $\alpha$ ), molecular weight (MW), molar refractivity (MR), molar volume (MV), parachor (Pr), polarizability (Pol), the logarithm of the octanol-water partition coefficients (log P), the logarithm of the octanol-water distribution coefficients at pH 7.4 (log  $D_{7.4}$ ), intrinsic aqueous solubility (log WSo), solubility profile at pH 7.4 (WS<sub>7.4</sub>), plasma protein binding (PB), Ames test mutagenic index (MI and MIA) and human intestinal absorption (HIA).

The values of the acidity constants were used to calculate the  $\alpha$  values. Structural parameters (MW, MR, MV, Pr, Pol) were calculated with ACD-Chemsketch software. Other parameters (log P, log  $D_{7.4}$ , log WSo, WS<sub>7.4</sub>, PB, MI, MIA, HIA) were predicted with ChemSilico software.

The  $k_{IAM}$  (IAM retention factor) and corresponding log  $k_{IAM}$  values on both IAM.PC.DD2 column **1** and Sphingo-IAM column **2** were determined for the 23 test compounds from retention time measurements [ $k_{IAM} = (t_{ret} - t_0) / t_0$ ], as detailed in Table S1.

| <b>Table S1</b> $k_{IAM}$ values $[= (t_{ret} - t_0) / t_0]$ of 23 test compounds measured on IAM.PC.DD2 column 1 and Sphingo-IAM column 2 (+ conditions)                                                                           |                               |                                               |                                       |
|-------------------------------------------------------------------------------------------------------------------------------------------------------------------------------------------------------------------------------------|-------------------------------|-----------------------------------------------|---------------------------------------|
| <i>Conditions:</i>                                                                                                                                                                                                                  |                               |                                               |                                       |
| Isocratic elution (25 °C):<br>NH <sub>4</sub> OAc <sub>aq</sub> buffer (10 mM, pH 7.4) + MeOH (40 % v/v), <sup>2</sup><br>Waters 2690 Alliance HPLC chromatograph + Waters<br>2487 dual $\lambda$ absorbance detector (210-300 nm). |                               | 20 $\mu$ L, 50 $\mu$ g/mL<br>$t_0 = 1.20$ min |                                       |
| Data acquisition/processing:<br>PeakSimple Chromatography Data System (model 202).                                                                                                                                                  |                               | 15 cm x 4.6 mm<br>Flow 1 mL/min               | 15 cm x 3 mm<br>Flow 0.5 mL/min       |
| <i>Entry</i>                                                                                                                                                                                                                        | <i>Compound</i>               | <i>IAM.PC.DD2</i><br><i>column 1</i>          | <i>Sphingo-IAM</i><br><i>column 2</i> |
| 1                                                                                                                                                                                                                                   | acetaminophen                 | 0.51                                          | 0.72                                  |
| 2                                                                                                                                                                                                                                   | acetylsalicylic acid          | 0.08                                          | 2.49                                  |
| 3                                                                                                                                                                                                                                   | aminopyrine                   | 0.63                                          | 0.81                                  |
| 4                                                                                                                                                                                                                                   | amobarbital                   | 1.81                                          | 2.78                                  |
| 5                                                                                                                                                                                                                                   | antipyrine                    | 0.51                                          | 0.63                                  |
| 6                                                                                                                                                                                                                                   | benzene                       | 1.89                                          | 2.87                                  |
| 7                                                                                                                                                                                                                                   | carbamazepine                 | 2.31                                          | 3.04                                  |
| 8                                                                                                                                                                                                                                   | cimetidine                    | 1.05                                          | 0.83                                  |
| 9                                                                                                                                                                                                                                   | eserine                       | 4.63                                          | 1.18                                  |
| 10                                                                                                                                                                                                                                  | ethylbenzene                  | 6.07                                          | 11.43                                 |
| 11                                                                                                                                                                                                                                  | hexobarbital                  | 1.27                                          | 1.89                                  |
| 12                                                                                                                                                                                                                                  | ibuprofen                     | 0.73                                          | 11.95                                 |
| 13                                                                                                                                                                                                                                  | indomethacin                  | 1.66                                          | 27.72                                 |
| 14                                                                                                                                                                                                                                  | N-methyl-2-pyridineethanamine | 2.85                                          | 0.51                                  |
| 15                                                                                                                                                                                                                                  | omeprazole                    | 2.34                                          | 3.31                                  |
| 16                                                                                                                                                                                                                                  | oxazepam                      | 5.93                                          | 7.77                                  |
| 17                                                                                                                                                                                                                                  | pentobarbital                 | 1.89                                          | 2.93                                  |
| 18                                                                                                                                                                                                                                  | phenylbutazone                | 0.54                                          | 10.32                                 |
| 19                                                                                                                                                                                                                                  | phenytoin                     | 3.16                                          | 5.07                                  |
| 20                                                                                                                                                                                                                                  | ranitidine                    | 2.75                                          | 0.68                                  |
| 21                                                                                                                                                                                                                                  | ropinirole                    | 6.76                                          | 1.04                                  |
| 22                                                                                                                                                                                                                                  | salicylic acid                | 0.06                                          | 2.18                                  |
| 23                                                                                                                                                                                                                                  | toluene                       | 3.45                                          | 5.66                                  |

Using IAM.PC.DD2 column 1, the correlation between *in vivo* log BB values and predicted *in vitro* log BB values can be expressed with equation 1. This model explains 98 % of variance in the data.

*Equation 1:*

$$\log BB = -0.24 + 0.03 \alpha - 0.53 MW - 217.78 MR - 1.31 MV + 2.48 Pr + 216.82 Pol - 0.14 \log P - 0.21 \log D_{7.4} + 0.21 \log WSo - 0.39 WS_{7.4} + 0.17 PB - 0.15 MI + 0.04 MIA + 0.59 HIA + 0.85 \log k_{IAM}$$

Using Spingo-IAM column **2**, the correlation between *in vivo* log BB values and predicted *in vitro* log BB values can be expressed with equation 2. This model explains 95 % of variance in the data.

*Equation 2:*

$$\log \text{BB} = -0.25 + 0.37 \alpha - 0.29 \text{MW} - 36.38 \text{MR} + 0.57 \text{MV} + 0.10 \text{Pr} + 35.88 \text{Pol} - 0.06 \log \text{P} + 0.20 \log \text{D}_{7.4} + 0.36 \log \text{WSo} - 0.22 \text{WS}_{7.4} + 0.05 \text{PB} + 0.15 \text{MI} + 0.15 \text{MIA} + 0.28 \text{HIA} + 0.33 \log k_{\text{IAM}}$$

➡ Visual results: **Fig. 2** in the manuscript.

- 
- <sup>1</sup> Adapted from: Escuder-Gilabert, L.; Molero-Monfort, M.; Villanueva-Camañas, R. M.; Sagrado, S.; Medina-Hernández, M. J. *J. Chromatogr. B* **2004**, *807*, 193-201. Potential of biopartitioning micellar chromatography as an *in vitro* technique for predicting drug penetration across the blood-brain barrier.
- <sup>2</sup> Braddy, A. C.; Janáky, T.; Prokai, L. *J. Chromatogr. A* **2002**, *966*, 81-87. Immobilized artificial membrane chromatography coupled with atmospheric pressure ionization mass spectrometry.
